# Supplementary material for: Population structure, genetic connectivity, and adaptation in the Olympia oyster (Ostrea lurida) along the west coast of North America
Source: PubMed Central journal article supplement (PMC6503834; doi:10.1111/eva.12766), 2019-02-28
Supplement: EVA-12-923-s001.pdf [file EVA-12-923-s001.pdf]

58 loci may be useful for characterizing the adaptive potential of a species or population to future environmental  
59 conditions (Eizaguirre and Baltazar-Soares, 2014). Inferences from both neutral and adaptive markers should  
60 be combined when making management recommendations (Funk et al., 2012).

61 The Olympia oyster (*Ostrea lurida*, Carpenter 1864) is a native estuarine bivalve found from Baja  
62 California to the central coast of Canada, patchily distributed over strong environmental gradients (Chan et al.,  
63 2017; Schoch et al., 2006). Oysters are ecosystem engineers in estuaries, providing structured habitat and  
64 removing suspended sediments (zu Ermgassen et al., 2013; Coen et al., 2011). Unlike other oysters where  
65 both males and females spawn gametes (e.g., *Crassostrea*), the females fertilize eggs with sperm from the  
66 water column and initially brood larvae in the mantle cavity. After release, the larvae have been reported to be  
67 planktonic from seven days to eight weeks before settling on a hard substrate (Baker, 1995). The impact of  
68 maternal brooding on population structure in Osteriidae has not been examined.

69 Following devastating commercial exploitation in the 19<sup>th</sup> and early 20<sup>th</sup> centuries, recovery of Olympia  
70 oyster populations has been stifled by other anthropogenic threats (e.g., water quality issues, habitat loss,  
71 and possibly ocean acidification (Blake and Bradbury, 2012; Hettinger et al., 2013; Sanford et al., 2014)).  
72 The last 15 years has seen increased interest in the Olympia oyster, with restoration projects underway by  
73 both government and nongovernment agencies across its range (Pritchard et al., 2015). Current knowledge  
74 about the population genetic structure of *O. lurida* comes primarily from an unpublished 2011 dissertation,  
75 which sampled from San Francisco, CA to Vancouver Island, BC and found regional population structure  
76 using microsatellites (Stick, 2011). Two phylogeographic studies using two mitochondrial loci identified a  
77 phylogeographic break north of Willapa Bay, WA and established the southern boundary divide between *O.*  
78 *lurida* and its sister species *Ostrea conchaphila* (Polson et al., 2009; Raith et al., 2016). Future and ongoing  
79 management plans would benefit greatly from thorough analysis of the fine-scale genetic structure using  
80 modern genomic techniques and rangewide sampling (Camara and Vadopalas, 2009).

81 The objective of this study was to characterize the spatial population structure of the Olympia oyster  
82 across the majority of its range using both neutral and adaptive markers derived from genome-wide single  
83 nucleotide polymorphisms (SNPs). I specifically tested whether patterns of genetic variation suggest a smooth  
84 continuum of allele frequency shifts consistent with isolation-by-distance (IBD) (Malécot, 1968), regional  
85 blocks of genetic similarity that correspond to physical barriers (Hare and Avise, 1996), or the null model of no  
86 significant genetic differentiation (Grosberg and Cunningham, 2001). SNPs produced from high-throughput  
87 sequencing have led to the identification of previously undetected population structure in a number of marine

146 from Jon Puritz’s lab (Puritz et al., 2014). Input files and formats for subsequent analysis of population  
147 structure were created using a combination of custom Python code, custom R code, and the *radiator* R  
148 package (Gosselin, 2017). Every step of the assembly, filtering process, and creation of input files can be  
149 reproduced through Jupyter notebooks.

## 150 **Detection of loci under putative selection**

151 Following recommendations to utilize multiple methods to detect loci under putative directional selection  
152 (Benestan et al., 2016; Rellstab et al., 2015), three approaches were used on the filtered SNP dataset: BayeScan  
153 v.2.1, *OutFLANK* v.0.2, and *pcadapt* v.4.0.2. For BayeScan and *OutFLANK*, individuals were grouped into  
154 populations by sampling site. GBS loci which had SNPs identified as outliers in at least two of the approaches  
155 were classified as putative adaptive GBS loci. From these GBS loci, any SNP that had been identified as an  
156 outlier by at least one approach was separated from the full SNP dataset to create an “outlier” SNP dataset.  
157 Subsequent analyses of population structure were conducted on three SNP datasets: all SNPs (combined),  
158 outlier SNPs, and neutral SNPs—which excluded any SNP found on a putative adaptive GBS locus.

159 BayeScan uses a Bayesian approach to apply linear regression to decompose  $F_{ST}$  coefficients into  
160 population- and locus-specific components and estimates the posterior probability of a locus showing deviation  
161 from Hardy–Weinberg proportions (Foll and Gaggiotti, 2008). BayeScan analysis was based on 1:100 prior  
162 odds, with 100,000 iterations, a burn-in length of 50,000, a false discovery rate (FDR) of 10%, and default  
163 parameters. Results were visualized in R. *OutFLANK* is an R package that identifies  $F_{ST}$  outliers by inferring  
164 a distribution of neutral  $F_{ST}$  using likelihood on a trimmed distribution of  $F_{ST}$  values. Because of its likelihood  
165 method, *OutFLANK* calculates  $F_{ST}$  without sample size correction when inferring the neutral distribution.  
166 Simulation studies have shown that this approach has lower false positive rates compared to other  $F_{ST}$  outlier  
167 methods (Whitlock and Lotterhos, 2015). *OutFLANK* was run using default parameters and a  $q$ -value threshold  
168 of 0.1, which can be considered a false discovery rate (FDR) of 10%. For the R package *pcadapt*, individuals  
169 are not sorted into predefined populations. Instead, *pcadapt* ascertains population structure using principal  
170 component analysis (PCA), then identifies markers under putative selection as those that are excessively  
171 correlated with population structure. When compared to BayeScan, *pcadapt* was shown to have greater power  
172 in the presence of admixed individuals and when population structure is continuous (Luu et al., 2017)—both  
173 scenarios which are likely in *O. lurida*. A scree plot representing the percentage of variance explained by  
174 each PC was used to choose the number of principal components ( $K$ ) for *pcadapt*, and SNPs with a  $q$ -value  
175 threshold of 0.1 were categorized as outliers.

## 233 RESULTS

### 234 GBS and outlier detection

235 117 samples remained after removal of 14 samples with < 200,000 raw sequencing reads, 49 samples with  
236 < 15,000 clusters, and 65 samples missing data for over 55% of loci assembled across at least 75% of  
237 samples. One of the sampling sites for Willapa Bay, WA had a low number of individuals after filtering, so  
238 individuals from these two sites were combined into one population, for 19 total populations (4–9 individuals  
239 per population, mean = 6.2). 41,159 biallelic SNPs across 9,696 GBS loci were genotyped in greater than  
240 75% of these individuals (2.8% of prefiltered loci assembled by *ipyrad*). Average read depth per individual  
241 per GBS locus ranged from 21 to 120 (mean =  $32 \pm 14$ ). Further filtering by HWE and  $MAF > 2.5\%$  reduced  
242 the dataset to 13,424 SNPs across 6,187 GBS loci (the "combined" dataset).

243 Three different methods were employed to identify putative SNPs under selection. The number of outliers  
244 detected by each program and the overlap between programs is illustrated in Figure D1. *OutFLANK*, as the  
245 most conservative of the programs used (Whitlock and Lotterhos, 2015), had the lowest number of outlier  
246 markers detected with 31 SNPs across 16 GBS loci. 29 SNPs found across 16 GBS loci were identified as  
247 outliers by all three programs. 129 GBS loci contained SNPs identified as outliers by at least two approaches,  
248 with 235 SNPs included in the outlier dataset for subsequent population structure analyses. The neutral  
249 dataset, with 13,073 SNPs across 6,057 GBS loci, excluded any SNP found on a GBS locus with an outlier  
250 SNP.

### 251 Summary statistics, population differentiation, and spatial structure

#### 252 Summary statistics

253 Global  $F_{ST}$  for outliers ( $F_{ST} = 0.417$ ) was almost four five times greater than for the combined and neutral  
254 SNPs ( $F_{ST} = 0.105$  (combined), 0.097 (neutral)). The outlier dataset had the lowest  $H_o$ , but the highest  $H_e$   
255 (Table 1). Average  $F_{IS}$  within populations for the combined dataset was 0.0424, with all populations having a  
256 significantly positive  $F_{IS}$  value except Ladysmith, BC, Tomales Bay, CA, and South San Francisco Bay, CA  
257 which had small, yet significantly negative  $F_{IS}$  values. Mugu Lagoon had the highest  $F_{IS}$  value (Table A1).  
258 Summary statistics for the six phylogeographic regions identified in the following section are show in Table  
259 B1. Summary statistics were quantitatively very similar for the combined and neutral datasets, so that only  
260 the results for the outlier and neutral datasets are reported for all subsequent analyses.

320 (2015); Riviere et al. (2013); Pauletto et al. (2017); Wang et al. (2018); Shiel et al. (2017); Pan et al. (2015);  
321 de Lorgeril et al. (2005). 21 additional outlier GBS loci had positive matches to InterPro signatures without  
322 any BLASTx hits or gene ontology annotation. Plotting minor allele frequency against latitude for outlier  
323 SNPs demonstrates that the majority of outliers show a clinal pattern, where one allele is fixed from either  
324 Coos Bay, OR or San Francisco Bay, CA to the north, and the other allele increases in frequency towards the  
325 south (Figure D2).

## 326 **DISCUSSION**

327 Reduced-representation genomic methods, such as GBS, can greatly inform reintroduction efforts for threat-  
328 ened and exploited species by resolving fine-scaled population structure, providing estimates of genetic  
329 connectivity, and identifying informative markers for characterizing adaptive variation (Allendorf et al.,  
330 2010; Gagnaire et al., 2015). Using 13,424 GBS-derived SNPs, I characterized the rangewide population  
331 structure of the Olympia oyster from southern California to British Columbia and further identified 235 SNPs  
332 across 129 GBS loci potentially associated with local adaptation. Contrary to studies in some other marine  
333 species, neutral markers had greater power to detect fine-scale population structure compared to outliers.  
334 However, outlier loci did provide evidence for adaptive divergence among some populations with high inferred  
335 admixture, and are informative as candidate loci involved in local adaptation. This study highlights the  
336 importance of using both neutral and outlier markers for conservation and management applications.

### 337 **Regional population structure and gene flow**

338 Significant population structure was observed across the range of *O. lurida* in both the neutral and outlier  
339 markers, with sampling locations structured into six distinct regions. Notably, most of these regions fit well  
340 within previously described biogeographical provinces based on marine species distributions (Hall, 1964;  
341 Valentine, 1966; Fenberg et al., 2015). In addition to describing the rangewide population structure of *O.*  
342 *lurida*, the large geographic sampling of this study can facilitate the identification of oceanographic features  
343 along the eastern Pacific coast that may be important for structuring populations of marine species with similar  
344 life histories. Most of the inferred phylogeographic regions are bounded by areas of reduced gene flow, many  
345 of which align to oceanographic features that may be acting as barriers to dispersal. Below I discuss these  
346 phylogeographic regions and potential barriers in more detail, as well as provide some recommendations for  
347 management at local scales.

407 belong to a separate phylogeographic region all together, as this site was intermediate between *NWBC* and  
408 *Puget+BC* regions in the STRUCTURE, PCA, and TreeMix analyses. Genetic sampling from additional sites  
409 on the central coast of British Columbia and eastern coast of Vancouver Island could test this hypothesis.

410 The separation of these two regions from those to the south corroborates previous evidence from mitochon-  
411 drial loci of a strong phylogeographic divide (Polson et al., 2009). Although Cape Flattery and Puget Sound  
412 itself have both been classified as biogeographic barriers due to a bifurcation in ocean currents (Valentine,  
413 1966; Kelly and Palumbi, 2010), there are surprisingly few studies evaluating the genetic structure of species  
414 found both within Puget Sound and on the outer coast of Washington. Those that do focus on species with  
415 much longer dispersal times than *O. lurida* (Buonaccorsi et al., 2002; Cunningham et al., 2009; Iwamoto et al.,  
416 2015; Siegle et al., 2013; Jackson and O'Malley, 2017). To my knowledge, this is the first study in a marine  
417 mollusc to evaluate and identify significant population differentiation among Puget Sound populations and the  
418 outer coast. More studies are required to fully characterize the importance of this barrier across marine taxa.

419 Genetic differentiation within Puget Sound is relatively low at both neutral and outlier markers, with the  
420 exception of the northernmost site, Discovery Bay. The weak population structure within Puget Sound and the  
421 overall low genetic diversity in northern sites is likely due to recent genetic bottlenecks and range expansion  
422 after the last glacial maximum, which reached just north of Willapa Bay, WA (49°N latitude) until 12-13 kya  
423 (Dyke and Prest, 1987). Despite such low genetic differentiation, experimental assessments of local adaptation  
424 for populations within Puget Sound have detected heritable differences in fitness traits such as reproductive  
425 timing, growth rate, and gene expression in response to stress (Heare et al., 2017, 2018; Silliman et al., 2018).  
426 These results, coupled with experimental evidence for local adaptation to salinity among Northern California  
427 populations (Bible and Sanford, 2016), suggest that adaptive divergence in this species can occur in the face  
428 of high gene flow.

### 429 **Anthropogenic influences on population structure**

430 The evidence for reduced effective migration, low differentiation within most of the phylogeographic regions,  
431 and external estimates of effective dispersal (Carson, 2010), suggests that long distance dispersal is not a  
432 significant force in shaping population structure in this species. However, TreeMix inferred a few such  
433 migration events that cross aforementioned barriers to gene flow. To explain this evidence, I investigated  
434 the history of Olympia oyster exploitation and aquaculture through literature reviews, technical reports, grey  
435 literature, historical first-person accounts, and discussions with current restoration practitioners. The historical  
436 impact of human take and transportation on the Olympia oyster is substantial.

497 underlie the large number of individuals (128) removed during filtering. First, too many individuals may  
498 have been pooled per sequencing lane given the number of loci targeted, resulting in low sequencing depth  
499 for some individuals (Andrews et al., 2016). Second, these libraries were made and sequenced in-house as  
500 opposed to a dedicated commercial GBS facility. The protocol learning curve may be why a disproportionate  
501 number of individuals failed or had low sequencing depth in the first few prepared libraries. This filtering  
502 resulted in 4–9 individuals per population in the final dataset, which is sufficient for estimating  $F_{ST}$  when  
503  $> 1,000$  SNPs are used (Willing et al., 2012). While these small population sizes may limit the power to  
504 detect outlier loci (Foll and Gaggiotti, 2008), the probability of false positives is reduced by comparing across  
505 multiple outlier methods (Rellstab et al., 2015). Lastly, while methods like EEMS and PCA can characterize  
506 genetic differentiation, they cannot distinguish between the different demographic scenarios that may result in  
507 these patterns (Petkova et al., 2016).

## 508 **CONCLUSIONS**

509 This study provides the first comprehensive characterization of both neutral and adaptive population structure  
510 in the Olympia oyster, an ecologically important coastal species in North America. These results have direct  
511 implications for management policies and ongoing restoration efforts, and a future sustainable fishery. Putative  
512 adaptive loci identified here are excellent candidates for future research and may provide targets for genetic  
513 monitoring programs. Beyond these specific applications, this study contributes to the growing body of  
514 evidence for both population structure and adaptive differentiation in marine species. In particular, it is one  
515 of the first to utilize thousands of SNPs to characterize population structure from southern California to  
516 Vancouver Island. All analyses conducted for this study can be replicated using annotated Jupyter notebooks,  
517 allowing for clear dissemination of bioinformatics methods and future open-sourced research on the population  
518 structure of *O. lurida*.

## 519 **DATA ARCHIVING STATEMENT**

520 Genomic data (all filtered markers, putative neutral markers, and putative outliers) and sample metadata  
521 are available on Dryad (<https://doi.org/10.5061/dryad.114j8m1>). Raw demultiplexed DNA sequences for  
522 all sequenced individuals with  $> 200,000$  raw sequencing reads are available on NCBI SRA (Project Accession  
523 Number: PRJNA511386). Reproducible Jupyter notebooks are available at [https://github.com/ksil91/Ostrea\\_PopStructure](https://github.com/ksil91/Ostrea_PopStructure).

582 the ecological services provided by and impacts of native and cultured bivalves in shellfish-dominated  
583 ecosystems. In Shumway, S. E., editor, *Shellfish Aquaculture and the Environment*, chapter 9, pages  
584 239–295. John Wiley & Sons, Inc.

585 Cowen, R. K., Lwiza, K. M., Sponaugle, S., Paris, C. B., and Olson, D. B. (2000). Connectivity of marine  
586 populations: Open or closed? *Science*, 287:857–859.

587 Cunningham, K. M., Canino, M. F., Spies, I. B., and Hauser, L. (2009). Genetic isolation by distance and  
588 localized fjord population structure in Pacific cod (*Gadus macrocephalus*): Limited effective dispersal in  
589 the northeastern Pacific Ocean. *Can. J. Fish. Aquat. Sci.*, 66(1):153–166.

590 Danecek, P., Auton, A., Abecasis, G., Albers, C. A., Banks, E., DePristo, M. A., Handsaker, R. E., Lunter, G.,  
591 Marth, G. T., Sherry, S. T., McVean, G., Durbin, R., and 1000 Genomes Project Analysis Group (2011).  
592 The variant call format and VCFtools. *Bioinformatics*, 27(15):2156–2158.

593 David, A. A. (2018). Reconsidering panmixia: The erosion of phylogeographic barriers due to anthropogenic  
594 transport and the incorporation of biophysical models as a solution. *Frontiers in Marine Science*, 5:280.

595 Dawson, M. N. (2001). Phylogeography in coastal marine animals: A solution from California? *Journal of*  
596 *Biogeography*, 28(6):723–736.

597 de Lorgeril, J., Saulnier, D., Janech, M. G., Gueguen, Y., and Bachère, E. (2005). Identification of genes that  
598 are differentially expressed in hemocytes of the pacific blue shrimp (*Litopenaeus stylirostris*) surviving an  
599 infection with vibrio penaeicida. *Physiol. Genomics*, 21(2):174–183.

600 De Wit, P. and Palumbi, S. R. (2013). Transcriptome-wide polymorphisms of red abalone (*Haliotis rufescens*)  
601 reveal patterns of gene flow and local adaptation. *Mol. Ecol.*, 22(11):2884–2897.

602 Drinan, D. P., Gruenthal, K. M., Canino, M. F., Lowry, D., Fisher, M. C., and Hauser, L. (2018). Pop-  
603 ulation assignment and local adaptation along an isolation-by-distance gradient in Pacific cod (*Gadus*  
604 *macrocephalus*). *Evol. Appl.*, 103:17302.

605 Dyke, A. S. and Prest, V. K. (1987). Late Wisconsinan and Holocene history of the Laurentide ice sheet.  
606 *Gogr. Phys. Quat.*, 41(2):237.

607 Earl, Dent A. and vonHoldt, Bridgett M (2012). STRUCTURE HARVESTER: a website and program  
608 for visualizing STRUCTURE output and implementing the evanno method. *Conserv. Genet. Resour.*,  
609 4(2):359–361.

610 Eaton, D. A. R. (2014). PyRAD: assembly of de novo RADseq loci for phylogenetic analyses. *Bioinformatics*,  
611 30(13):1844–1849.

672 structure in the Salish Sea. *ICES J. Mar. Sci.*, 72(9):2720–2731.

673 Jackson, T. M. and O’Malley, K. G. (2017). Comparing genetic connectivity among dungeness crab (*Cancer*  
674 *magister*) inhabiting puget sound and coastal washington. *Mar. Biol.*, 164(6):123.

675 Jombart, T. and Ahmed, I. (2011). adegenet 1.3-1: new tools for the analysis of genome-wide SNP data.  
676 *Bioinformatics*, 27(21):3070–3071.

677 Kanwal, S., Khan, F. Z., Lonie, A., and Sinnott, R. O. (2017). Investigating reproducibility and tracking  
678 provenance - a genomic workflow case study. *BMC Bioinformatics*, 18(1):337.

679 Kelly, R. P. and Palumbi, S. R. (2010). Genetic structure among 50 species of the northeastern Pacific rocky  
680 intertidal community. *PLoS One*, 5(1):e8594.

681 Kluyver, T., Ragan-Kelley, B., Pérez, F., Granger, B., Bussonnier, M., Frederic, J., Kelley, K., Hamrick, J.,  
682 Grout, J., Corlay, S., Ivanov, P., Avila, D., and Jupyter Development Team (2016). Jupyter notebooks — a  
683 publishing framework for reproducible computational workflows. In Loizides, F. and Schmidt, B., editors,  
684 *Positioning and Power in Academic Publishing: Players, Agents and Agendas*, pages 87–90. IOS Press.

685 Kopelman, N. M., Mayzel, J., Jakobsson, M., Rosenberg, N. A., and Mayrose, I. (2015). CLUMPAK: A  
686 program for identifying clustering modes and packaging population structure inferences across K. *Mol.*  
687 *Ecol. Resour.*, 15(5):1179–1191.

688 Lallias, D., Taris, N., Boudry, P., Bonhomme, F., and Lapègue, S. (2010). Variance in the reproductive success  
689 of flat oyster *ostrea edulis* l. assessed by parentage analyses in natural and experimental conditions. *Genet.*  
690 *Res.*, 92(3):175–187.

691 Larson, W. A., Seeb, L. W., Everett, M. V., Waples, R. K., Templin, W. D., and Seeb, J. E. (2014). Geno-  
692 typing by sequencing resolves shallow population structure to inform conservation of Chinook salmon  
693 (*Oncorhynchus tshawytscha*). *Evol. Appl.*, 7(3):355–369.

694 Lenormand, T. (2002). Gene flow and the limits to natural selection. *Trends Ecol. Evol.*, 17(4):183–189.

695 Li, B., Song, K., Meng, J., Li, L., and Zhang, G. (2017). Integrated application of transcriptomics and  
696 metabolomics provides insights into glycogen content regulation in the Pacific oyster *Crassostrea gigas*.  
697 *BMC Genomics*, 18(1):713.

698 Lowry, D. B., Hoban, S., Kelley, J. L., Lotterhos, K. E., Reed, L. K., Antolin, M. F., and Storfer, A. (2017).  
699 Breaking RAD: an evaluation of the utility of restriction site-associated DNA sequencing for genome scans  
700 of adaptation. *Mol. Ecol. Resour.*, 17(2):142–152.

701 Luisetti, T., Turner, R. K., Jickells, T., Andrews, J., Elliott, M., Schaafsma, M., Beaumont, N., Malcolm, S.,



762 Schoch, G. C., Menge, B. A., Allison, G., Kavanaugh, M., Thompson, S. A., and A. Wood, S. (2006). Fifteen  
763 degrees of separation: Latitudinal gradients of rocky intertidal biota along the California Current. *Limnol.*  
764 *Oceanogr.*, 51(6):2564–2585.

765 Shiel, B. P., Hall, N. E., Cooke, I. R., Robinson, N. A., and Strugnell, J. M. (2017). Epipodial tentacle  
766 gene expression and predetermined resilience to summer mortality in the commercially important greenlip  
767 abalone, *haliotis laevis*. *Mar. Biotechnol.*, 19(2):191–205.

768 Siegle, M. R., Taylor, E. B., Miller, K. M., Withler, R. E., and Yamanaka, K. L. (2013). Subtle population  
769 genetic structure in yelloweye rockfish (*Sebastes ruberrimus*) is consistent with a major oceanographic  
770 division in British Columbia, Canada. *PLoS One*, 8(8):e71083.

771 Silliman, K. E., Bowyer, T. K., and Roberts, S. B. (2018). Consistent differences in fitness traits across  
772 multiple generations of *Olympia* oysters. *Sci. Rep.*, 8(1):6080.

773 Sokal, R. R. (1979). Testing statistical significance of geographic variation patterns. *Syst. Zool.*, 28(2):227–  
774 232.

775 Stapley, J., Reger, J., Feulner, P. G. D., Smadja, C., Galindo, J., Ekblom, R., Bennison, C., Ball, A. D.,  
776 Beckerman, A. P., and Slate, J. (2010). Adaptation genomics: The next generation. *Trends Ecol. Evol.*,  
777 25(12):705–712.

778 Stick, D. A. (2011). *Identification of optimal broodstock for Pacific Northwest oysters*. PhD thesis, Oregon  
779 State University.

780 Szent-Györgyi, A. G., Kalabokis, V. N., and Perreault-Micale, C. L. (1999). Regulation by molluscan myosins.  
781 In Imai, S., Ohtsuki, I., and Endo, M., editors, *Muscle Physiology and Biochemistry*, pages 55–62. Springer  
782 US, Boston, MA.

783 Tepolt, C. K. and Palumbi, S. R. (2015). Transcriptome sequencing reveals both neutral and adaptive genome  
784 dynamics in a marine invader. *Mol. Ecol.*, 24(16):4145–4158.

785 Townsend, C. H. (1895). The transplanting of eastern oysters to Willapa Bay, Washington, with notes on the  
786 native oyster industry. Technical Report 334, U.S. Bureau of Fisheries.

787 Valentine, J. W. (1966). Numerical analysis of marine molluscan ranges on extratropical northeastern Pacific  
788 shelf. *Limnol. Oceanogr.*, 11:198–211.

789 Van Wyngaarden, M., Snelgrove, P. V. R., DiBacco, C., Hamilton, L. C., Rodríguez-Ezpeleta, N., Jeffery,  
790 N. W., Stanley, R. R. E., and Bradbury, I. R. (2016). Identifying patterns of dispersal, connectivity, and  
791 selection in the sea scallop, *Placopecten magellanicus*, using RAD-seq derived SNPs. *Evol. Appl.*, (August).

| Locus ID     | Gene description                                  | Top GO IDs                                                                  | Top hit species                |
|--------------|---------------------------------------------------|-----------------------------------------------------------------------------|--------------------------------|
| locus_5648   | DNA N6-methyl adenine demethylase                 | F:dioxygenase activity activity                                             | <i>C. gigas</i>                |
| locus_6412   | glucose dehydrogenase [FAD, quinone]              | None                                                                        | <i>C. gigas</i>                |
| locus_7299   | transcriptional regulator ERG                     | None                                                                        | <i>C. gigas</i>                |
| locus_10670  | Fez family zinc finger protein 1                  | F:nucleic acid binding                                                      | <i>C. gigas</i>                |
| locus_44811  | sodium-dependent phosphate transport protein 2B   | F:sodium-dependent phosphate transmembrane transporter activity             | <i>C. gigas</i>                |
| locus_50945  | glyoxalase 3-like                                 | None                                                                        | <i>C. virginica</i>            |
| locus_57217  | uncharacterized protein LOC111115623              | None                                                                        | <i>C. virginica</i>            |
| locus_98257  | uncharacterized protein LOC111133343              | None                                                                        | <i>C. virginica</i>            |
| locus_121489 | E3 ubiquitin-protein ligase TRIM9                 | F:zinc ion binding                                                          | <i>C. virginica</i>            |
| locus_123004 | Transposon Ty3-G Gag-Pol polyprotein              | None                                                                        | <i>Mizuhopecten yessoensis</i> |
| locus_170867 | carnitine O-palmitoyltransferase 2, mitochondrial | F:calcium ion binding, F: transferase activity                              | <i>C. gigas</i>                |
| locus_196263 | myosin-XVIIIa                                     | F:actin filament binding                                                    | <i>C. gigas</i>                |
| locus_251628 | myosin heavy chain, striated muscle               | F:microtubule motor activity                                                | <i>C. gigas</i>                |
| locus_252560 | helicase domino-like                              | None                                                                        | <i>C. virginica</i>            |
| locus_276278 | heavy metal-binding protein HIP                   | None                                                                        | <i>C. gigas</i>                |
| locus_277490 | NADH dehydrogenase subunit 5, mitochondrion       | C:mitochondrion                                                             | <i>O. lurida</i>               |
| locus_339584 | serine/threonine-protein kinase B-raf             | F:metal ion binding, F:kinase activity, P:intracellular signal transduction | <i>C. virginica</i>            |
| locus_339916 | vesicular glutamate transporter 2.1               | P:transmembrane transport                                                   | <i>C. gigas</i>                |

**Table 2.** BLASTx and gene ontology (GO) annotation results for outlier loci. Only the 18 loci with positive BLAST hits are shown. F: molecular function, C: cellular component, P: biological process.

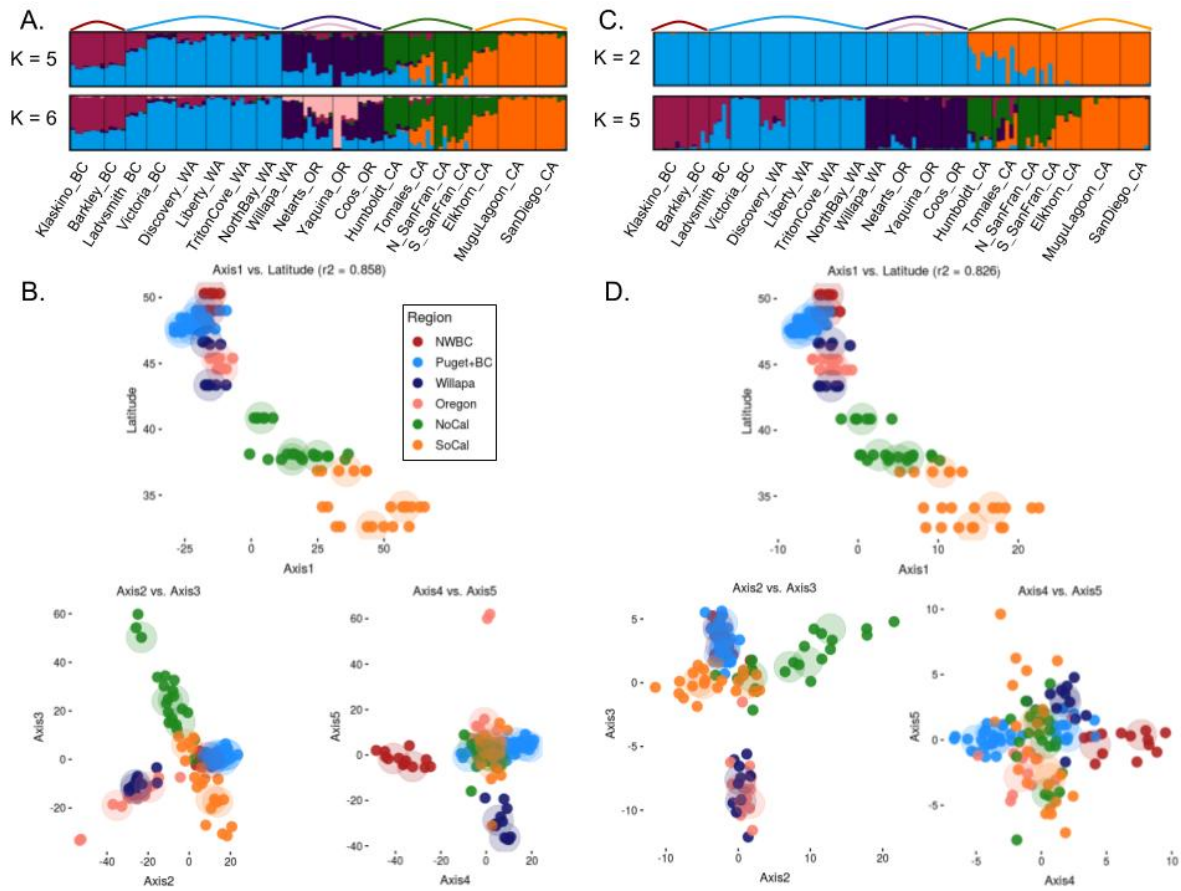

Figure 2

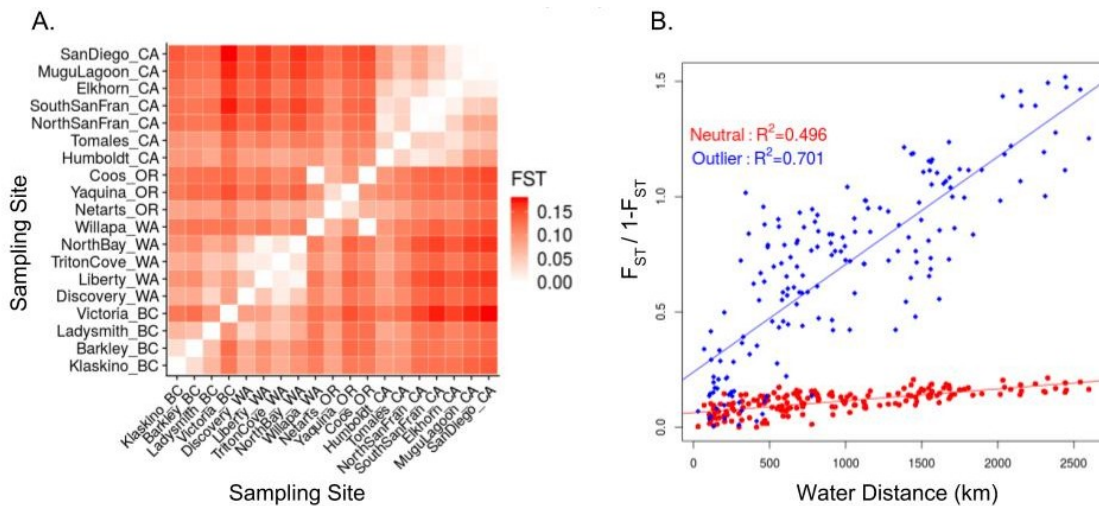

Figure 3

## 845 Appendix A: Sampling locations and population-specific summary statistics

| Sampling Site                           | Latitude | Longitude  | # of individuals used in analysis | $H_e$  | $F_{IS}$ (C.I.)                |
|-----------------------------------------|----------|------------|-----------------------------------|--------|--------------------------------|
| Klaskino Inlet, BC                      | 50.29867 | -127.72363 | 8                                 | 0.1903 | 0.0686<br>(0.0594 - 0.0786)    |
| Barkley Sound, BC                       | 49.01585 | -125.31417 | 5                                 | 0.1865 | 0.00664<br>(0.0540 - 0.0795)   |
| Ladysmith Harbour, BC                   | 49.01138 | -123.8357  | 5                                 | 0.1897 | -0.0554<br>(-0.0700 - -0.0396) |
| Victoria Gorge, BC                      | 48.43567 | -123.37791 | 7                                 | 0.1717 | 0.0515<br>(0.0405 - 0.0631)    |
| Discovery Bay, Puget Sound, WA          | 47.9978  | -122.8824  | 7                                 | 0.1810 | 0.0593<br>(0.0483 - 0.0699)    |
| Liberty Bay, Puget Sound, WA            | 47.7375  | -122.6507  | 6                                 | 0.1768 | 0.0309<br>(0.0194 - 0.0426)    |
| Triton Cove, Puget Sound, WA            | 47.6131  | -122.982   | 6                                 | 0.1820 | 0.0336<br>(0.0219 - 0.0462)    |
| North Bay, Puget Sound, WA              | 47.3925  | -122.8138  | 6                                 | 0.1756 | 0.0524<br>(0.0404 - 0.0634)    |
| Willapa Bay, WA (North & South)         | 46.62477 | -123.98879 | 3                                 | 0.1798 | 0.0556                         |
|                                         | 46.4400  | -124.004   | 2                                 |        | (0.0420 - 0.0685)              |
| Netarts Bay, OR                         | 45.39116 | -123.95590 | 7                                 | 0.1968 | 0.0584<br>(0.0470 - 0.0698)    |
| Yaquina Bay, OR                         | 44.57954 | -123.99577 | 6                                 | 0.1876 | 0.0143<br>(0.0018 - 0.0274)    |
| Coos Bay, OR                            | 43.35599 | -124.19316 | 6                                 | 0.1809 | 0.0531<br>(0.0411 - 0.0654)    |
| Humboldt Bay, CA                        | 40.85580 | -124.09746 | 6                                 | 0.2146 | 0.0327<br>(0.0209 - 0.0451)    |
| Tomales Bay, CA                         | 38.11755 | -122.87450 | 6                                 | 0.2270 | -0.0023<br>(-0.0133 - 0.0077)  |
| Point Orient, San Francisco Bay, CA     | 37.95507 | -122.42180 | 5                                 | 0.2209 | 0.0560<br>(0.0450 - 0.0668)    |
| Candlestick Park, San Francisco Bay, CA | 37.70867 | -122.37761 | 4                                 | 0.2234 | -0.0974<br>(-0.1181 - -0.0745) |
| Elkhorn Slough, CA                      | 36.83982 | -121.74278 | 6                                 | 0.2477 | 0.0859<br>(0.0745 - 0.0978)    |
| Mugu Lagoon, CA                         | 34.10191 | -119.10434 | 9                                 | 0.2535 | 0.1327<br>(0.1239 - 0.1411)    |
| San Diego Bay, CA                       | 32.60250 | -117.11889 | 7                                 | 0.2500 | 0.0948<br>(0.0851 - 0.1049)    |

**Table A.1.** GPS coordinates of sampling sites and population-specific summary statistics averaged across markers using the combined dataset of 13,424 SNPs.  $H_e$ , expected heterozygosity;  $F_{IS}$ , inbreeding coefficient within the population, mean and 25%-75% confidence intervals (Nei and Chesser, 1983);

**Appendix B: Summary statistics for phylogeographic regions**

| Region   | $H_o$ | $H_e$ | $F_{IS}$                    | $F_{ST}$ |
|----------|-------|-------|-----------------------------|----------|
| NWBC     | 0.177 | 0.193 | 0.0821<br>(0.0738 - 0.0897) | 0.016    |
| Puget+BC | 0.174 | 0.189 | 0.0814<br>(0.0758 - 0.0862) | 0.046    |
| Willapa  | 0.171 | 0.182 | 0.0583<br>(0.0495 - 0.0666) | 0.001    |
| Oregon   | 0.185 | 0.196 | 0.0556<br>(0.0474 - 0.0645) | 0.016    |
| NoCal    | 0.215 | 0.227 | 0.0536<br>(0.0472 - 0.0592) | 0.022    |
| SoCal    | 0.224 | 0.253 | 0.115<br>(0.1097 - 0.1209)  | 0.007    |

**Table B.1.** Overall summary statistics for each phylogeographic region using the neutral dataset of 13,073 SNPs.  $H_o$ , observed heterozygosity averaged across loci;  $H_e$ , expected heterozygosity averaged across loci;  $F_{IS}$  &  $F_{ST}$ , Wright's  $F$ -statistics averaged across loci (Nei and Chesser, 1983). Note that  $F_{ST}$  may be skewed by variation in sampling strategy across regions.

### Appendix C: Pairwise $F_{ST}$ values for outlier and neutral datasets

|                 | Klaskino_BC | Barkley_BC | Ladysmith_BC | Victoria_BC | Discovery_WA | Liberty_WA | TritonCove_WA | NorthBay_WA | Willapa_WA | Nearns_OR | Yaquina_OR | Coos_OR | Humboldt_CA | Tomales_CA | NorthSanFran_CA | SouthSanFran_CA | Elkhorn_CA | MuguLagoon_CA |        |
|-----------------|-------------|------------|--------------|-------------|--------------|------------|---------------|-------------|------------|-----------|------------|---------|-------------|------------|-----------------|-----------------|------------|---------------|--------|
| 0               |             |            |              |             |              |            |               |             |            |           |            |         |             |            |                 |                 |            |               |        |
| Klaskino_BC     | 0           |            |              |             |              |            |               |             |            |           |            |         |             |            |                 |                 |            |               |        |
| Barkley_BC      | 0.0306      | 0          |              |             |              |            |               |             |            |           |            |         |             |            |                 |                 |            |               |        |
| Ladysmith_BC    | 0.0663      | 0.0564     | 0            |             |              |            |               |             |            |           |            |         |             |            |                 |                 |            |               |        |
| Victoria_BC     | 0.1193      | 0.1270     | 0.0931       | 0           |              |            |               |             |            |           |            |         |             |            |                 |                 |            |               |        |
| Discovery_WA    | 0.0742      | 0.0768     | 0.0381       | 0.0873      | 0            |            |               |             |            |           |            |         |             |            |                 |                 |            |               |        |
| Liberty_WA      | 0.0965      | 0.1021     | 0.0650       | 0.0864      | 0.0526       | 0          |               |             |            |           |            |         |             |            |                 |                 |            |               |        |
| TritonCove_WA   | 0.0751      | 0.0800     | 0.0516       | 0.0575      | 0.0176       | 0.0166     | 0             |             |            |           |            |         |             |            |                 |                 |            |               |        |
| NorthBay_WA     | 0.0965      | 0.1050     | 0.0750       | 0.0904      | 0.0476       | 0.0075     | 0.0246        | 0           |            |           |            |         |             |            |                 |                 |            |               |        |
| Willapa_WA      | 0.1136      | 0.1228     | 0.1197       | 0.1247      | 0.1056       | 0.1184     | 0.0946        | 0.1141      | 0          |           |            |         |             |            |                 |                 |            |               |        |
| Nearns_OR       | 0.0825      | 0.0888     | 0.0824       | 0.1097      | 0.0804       | 0.0854     | 0.0703        | 0.0777      | 0.0642     | 0         |            |         |             |            |                 |                 |            |               |        |
| Yaquina_OR      | 0.1190      | 0.1304     | 0.1276       | 0.1480      | 0.1220       | 0.1379     | 0.1184        | 0.1359      | 0.0948     | 0.0310    | 0          |         |             |            |                 |                 |            |               |        |
| Coos_OR         | 0.1159      | 0.1245     | 0.1265       | 0.1338      | 0.1120       | 0.1217     | 0.1048        | 0.1189      | 0.00139    | 0.0687    | 0.0918     | 0       |             |            |                 |                 |            |               |        |
| Humboldt_CA     | 0.0915      | 0.0936     | 0.0789       | 0.1172      | 0.0884       | 0.0877     | 0.0767        | 0.0870      | 0.0927     | 0.0684    | 0.1045     | 0.0927  | 0           |            |                 |                 |            |               |        |
| Tomales_CA      | 0.0970      | 0.0940     | 0.0886       | 0.1282      | 0.1033       | 0.1165     | 0.0998        | 0.1171      | 0.1122     | 0.0821    | 0.1116     | 0.1117  | 0.0397      | 0          |                 |                 |            |               |        |
| NorthSanFran_CA | 0.1248      | 0.1222     | 0.1198       | 0.1555      | 0.1309       | 0.1452     | 0.1252        | 0.1458      | 0.1207     | 0.1023    | 0.1244     | 0.1280  | 0.0176      | 0.0418     | 0               |                 |            |               |        |
| SouthSanFran_CA | 0.1256      | 0.1204     | 0.1258       | 0.1717      | 0.1424       | 0.1566     | 0.1347        | 0.1574      | 0.1364     | 0.1025    | 0.1318     | 0.1364  | 0.0295      | 0.0399     | 0.0039          | 0               |            |               |        |
| Elkhorn_CA      | 0.1228      | 0.1135     | 0.1108       | 0.1578      | 0.1292       | 0.1431     | 0.1182        | 0.1417      | 0.1231     | 0.1004    | 0.1247     | 0.1284  | 0.0470      | 0.0261     | 0.0398          | 0.0135          | 0          |               |        |
| MuguLagoon_CA   | 0.1351      | 0.1250     | 0.1241       | 0.1698      | 0.1414       | 0.1559     | 0.1366        | 0.1588      | 0.1402     | 0.1212    | 0.1386     | 0.1448  | 0.0880      | 0.0523     | 0.0779          | 0.0453          | 0.0164     | 0             |        |
| SanDiego_CA     | 0.1417      | 0.1322     | 0.1320       | 0.1764      | 0.1445       | 0.1619     | 0.1392        | 0.1641      | 0.1481     | 0.1270    | 0.1467     | 0.1534  | 0.0892      | 0.0604     | 0.0811          | 0.0520          | 0.0132     | 0.0016        | 0.0016 |

**Table C.1.** Pairwise  $F_{ST}$  values for all pairs of populations, using the neutral dataset of 13,073 SNPs.

|                 | Klamath_BC | Barkley_BC | Ladysmith_BC | Victoria_BC | Discovery_WA | Liberty_WA | TritonCove_WA | NorthBay_WA | Willapa_WA | Nearts_OR | Yaquina_OR | Coos_OR | Humboldt_CA | Tomales_CA | NorthSanFran_CA | SouthSanFran_CA | Elkhorn_CA | MuguLagoon_CA |  |
|-----------------|------------|------------|--------------|-------------|--------------|------------|---------------|-------------|------------|-----------|------------|---------|-------------|------------|-----------------|-----------------|------------|---------------|--|
| Barkley_BC      | 0.0660     |            |              |             |              |            |               |             |            |           |            |         |             |            |                 |                 |            |               |  |
| Ladysmith_BC    | 0.1848     | 0.0990     | 0            |             |              |            |               |             |            |           |            |         |             |            |                 |                 |            |               |  |
| Victoria_BC     | 0.4565     | 0.3553     | 0.3192       | 0           |              |            |               |             |            |           |            |         |             |            |                 |                 |            |               |  |
| Discovery_WA    | 0.2161     | 0.1151     | 0.0804       | 0.2707      | 0            |            |               |             |            |           |            |         |             |            |                 |                 |            |               |  |
| Liberty_WA      | 0.3705     | 0.2820     | 0.1894       | 0.1837      | 0.1306       | 0          |               |             |            |           |            |         |             |            |                 |                 |            |               |  |
| TritonCove_WA   | 0.3817     | 0.2981     | 0.1886       | 0.1616      | 0.1336       | 0.0398     | 0             |             |            |           |            |         |             |            |                 |                 |            |               |  |
| NorthBay_WA     | 0.3863     | 0.2874     | 0.2008       | 0.1777      | 0.1090       | 0.0109     | 0.0524        | 0           |            |           |            |         |             |            |                 |                 |            |               |  |
| Willapa_WA      | 0.4510     | 0.4372     | 0.4018       | 0.5178      | 0.3687       | 0.4915     | 0.4768        | 0.4871      | 0          |           |            |         |             |            |                 |                 |            |               |  |
| Nearts_OR       | 0.4119     | 0.3803     | 0.3214       | 0.3964      | 0.3247       | 0.3686     | 0.3832        | 0.3678      | 0.1496     | 0         |            |         |             |            |                 |                 |            |               |  |
| Yaquina_OR      | 0.4554     | 0.4401     | 0.3936       | 0.4739      | 0.4003       | 0.4548     | 0.4589        | 0.4515      | 0.2160     | 0.0453    | 0          |         |             |            |                 |                 |            |               |  |
| Coos_OR         | 0.4497     | 0.4396     | 0.3987       | 0.5085      | 0.3737       | 0.4934     | 0.4808        | 0.4839      | 0.0090     | 0.1328    | 0.2212     | 0       |             |            |                 |                 |            |               |  |
| Humboldt_CA     | 0.4659     | 0.4289     | 0.3807       | 0.5065      | 0.4316       | 0.4681     | 0.4676        | 0.4614      | 0.4397     | 0.3945    | 0.4271     | 0.4461  | 0           |            |                 |                 |            |               |  |
| Tomales_CA      | 0.3696     | 0.3283     | 0.3357       | 0.4652      | 0.3656       | 0.4571     | 0.4369        | 0.4443      | 0.3772     | 0.3299    | 0.3298     | 0.3935  | 0.2466      | 0          |                 |                 |            |               |  |
| NorthSanFran_CA | 0.5057     | 0.4690     | 0.4456       | 0.5594      | 0.4951       | 0.5467     | 0.5366        | 0.5298      | 0.4958     | 0.4557    | 0.4642     | 0.4979  | 0.0475      | 0.2435     | 0               |                 |            |               |  |
| SouthSanFran_CA | 0.4822     | 0.4257     | 0.4303       | 0.5647      | 0.4762       | 0.5484     | 0.5446        | 0.5416      | 0.4800     | 0.4352    | 0.4515     | 0.4941  | 0.0830      | 0.1520     | 0.0637          | 0               |            |               |  |
| Elkhorn_CA      | 0.4782     | 0.4275     | 0.4407       | 0.5410      | 0.4716       | 0.5444     | 0.5343        | 0.5341      | 0.4457     | 0.4341    | 0.4413     | 0.4716  | 0.3276      | 0.1446     | 0.2733          | 0.1697          | 0          |               |  |
| MuguLagoon_CA   | 0.5749     | 0.5378     | 0.5490       | 0.6299      | 0.5760       | 0.6278     | 0.6190        | 0.6228      | 0.5608     | 0.5531    | 0.5555     | 0.5825  | 0.5130      | 0.3423     | 0.4705          | 0.3567          | 0.1320     | 0             |  |
| SanDiego_CA     | 0.5744     | 0.5313     | 0.5471       | 0.6320      | 0.5758       | 0.6278     | 0.6194        | 0.6308      | 0.5700     | 0.5466    | 0.5507     | 0.5822  | 0.5059      | 0.3278     | 0.4753          | 0.3366          | 0.1271     | 0.0172        |  |

**Table C-2.** Pairwise  $F_{ST}$  values for all pairs of populations, using the outlier dataset of 235 SNPs.

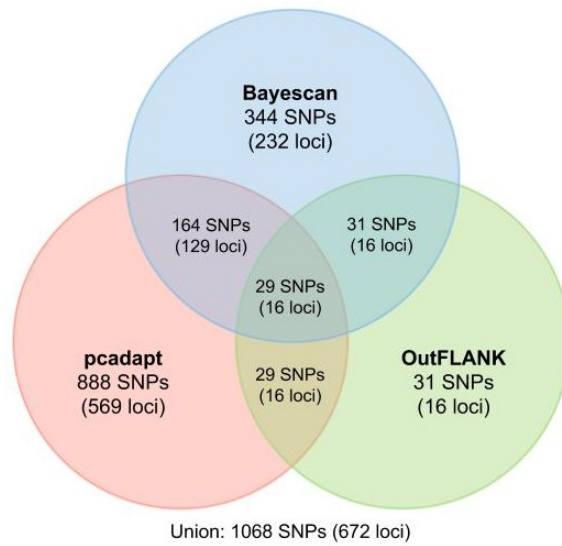

**Figure D.1.** Venn diagram with number of SNPs and Genotype-by-Sequencing loci identified as outliers by three methods: *pcadapt*, *OutFLANK*, and BayeScan



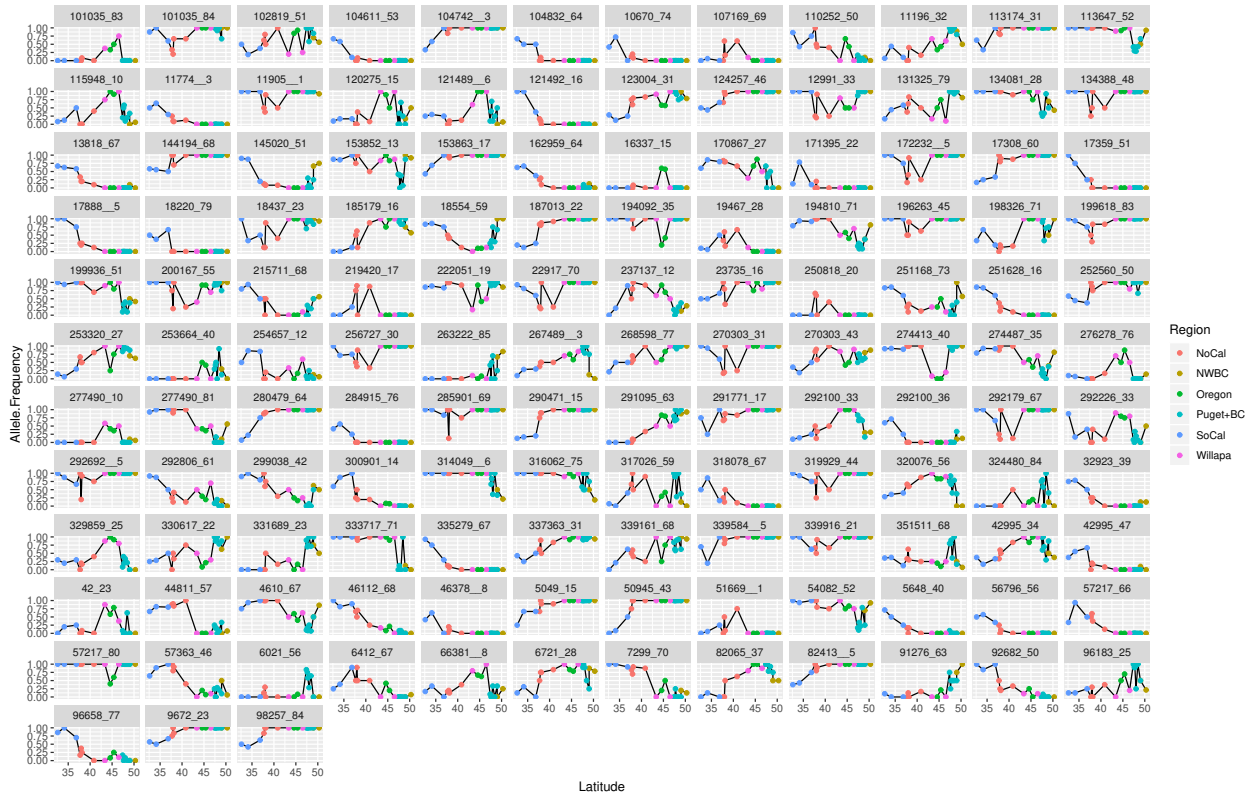

**Figure D.2.** Outlier loci predominantly show clinal patterns in allele frequency. Allele frequency in 129 individual outlier loci plotted against latitude for 19 populations of *O. lurida*. One SNP is represented for each locus, except in the case where two outlier SNPs from the same locus showed different spatial patterns (e.g., locus.277490). Populations are colored by inferred phylogeographic regions.
